# Supplementary material
Source: publisher figshare collection journal article supplement (https://acs.figshare.com/ndownloader/files/9355102)
Supplement: Supplementary file 1 [file 9355102]

Matthew T. Campbell, Dazhe Chen, Nicholas J. Wallbillich, Gary L. Glish

**Distinguishing Biologically Relevant Hexoses by Water Adduction to Lithiated Ions**

Department of Chemistry, Caudill Laboratories, The University of North Carolina at Chapel Hill, Chapel Hill, NC 27599-3290, USA

The following supplemental information contains CID mass spectra of lithiated D-glucose, D-fructose, D-galactose, and D-mannose obtained in a quadrupole ion trap mass spectrometer

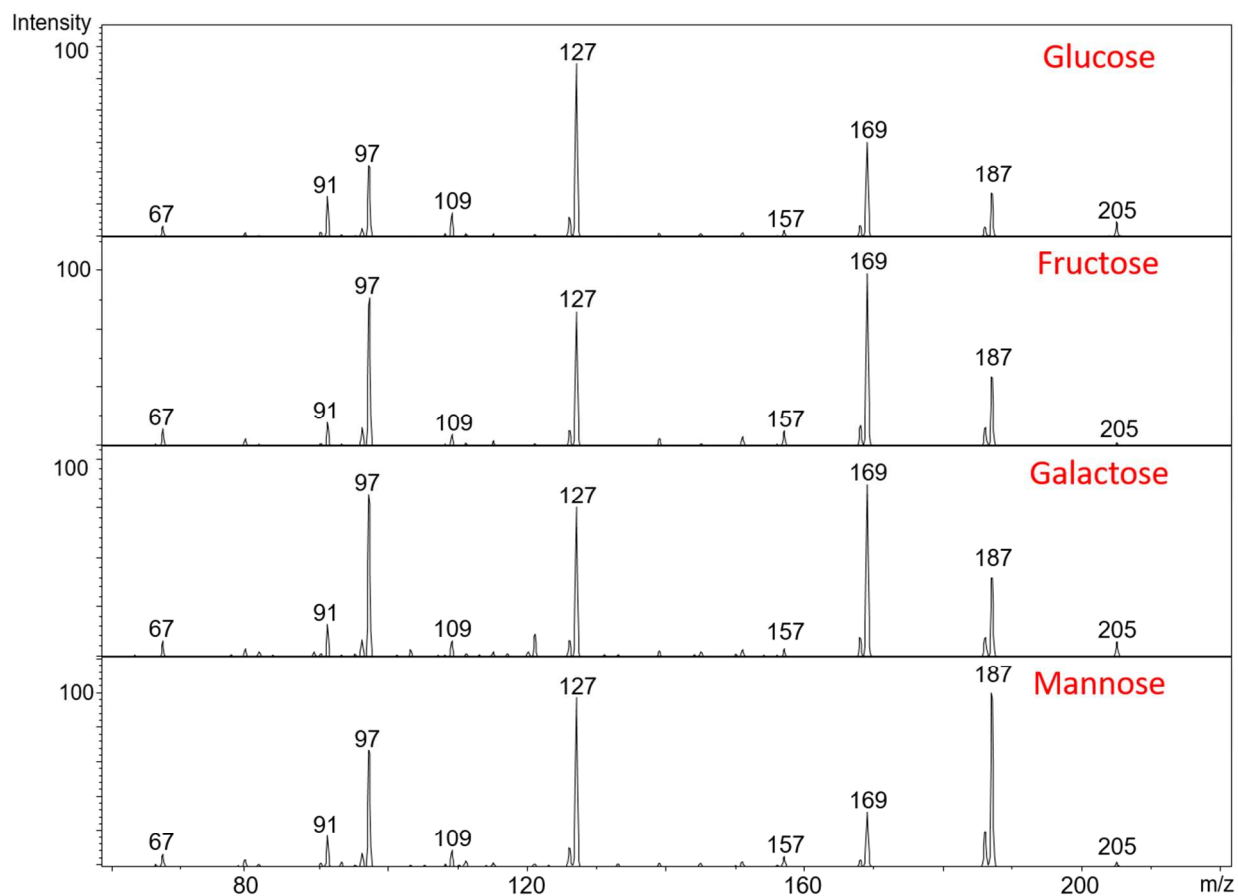

Figure S-1: CID mass spectra for each of the four hexoses studied.

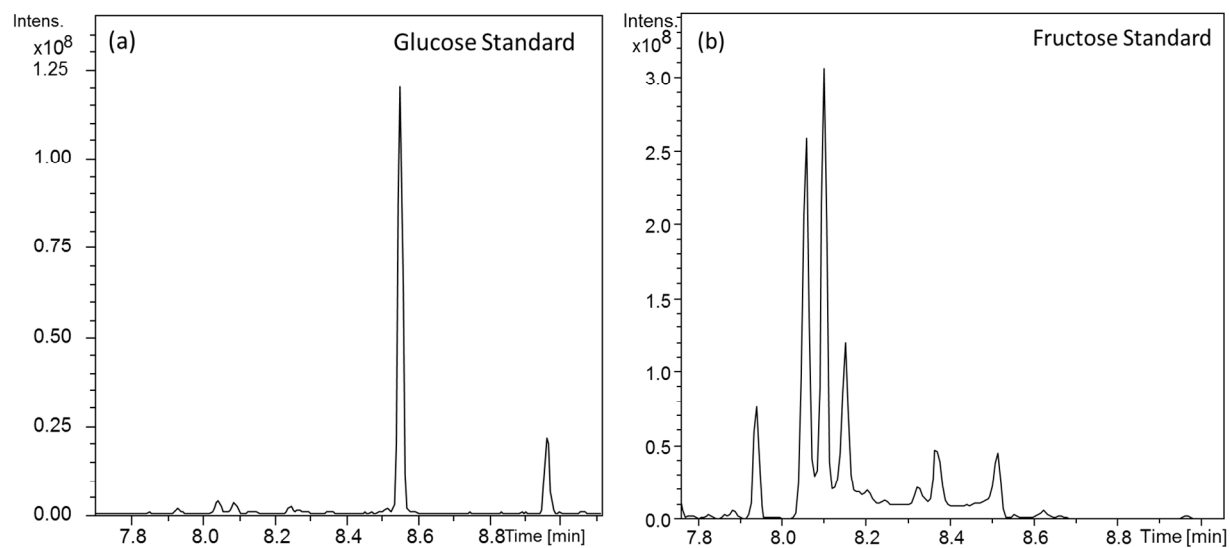

Figure S-2: Chromatograms of either glucose or fructose standards. Multiple peaks are observed for both species.

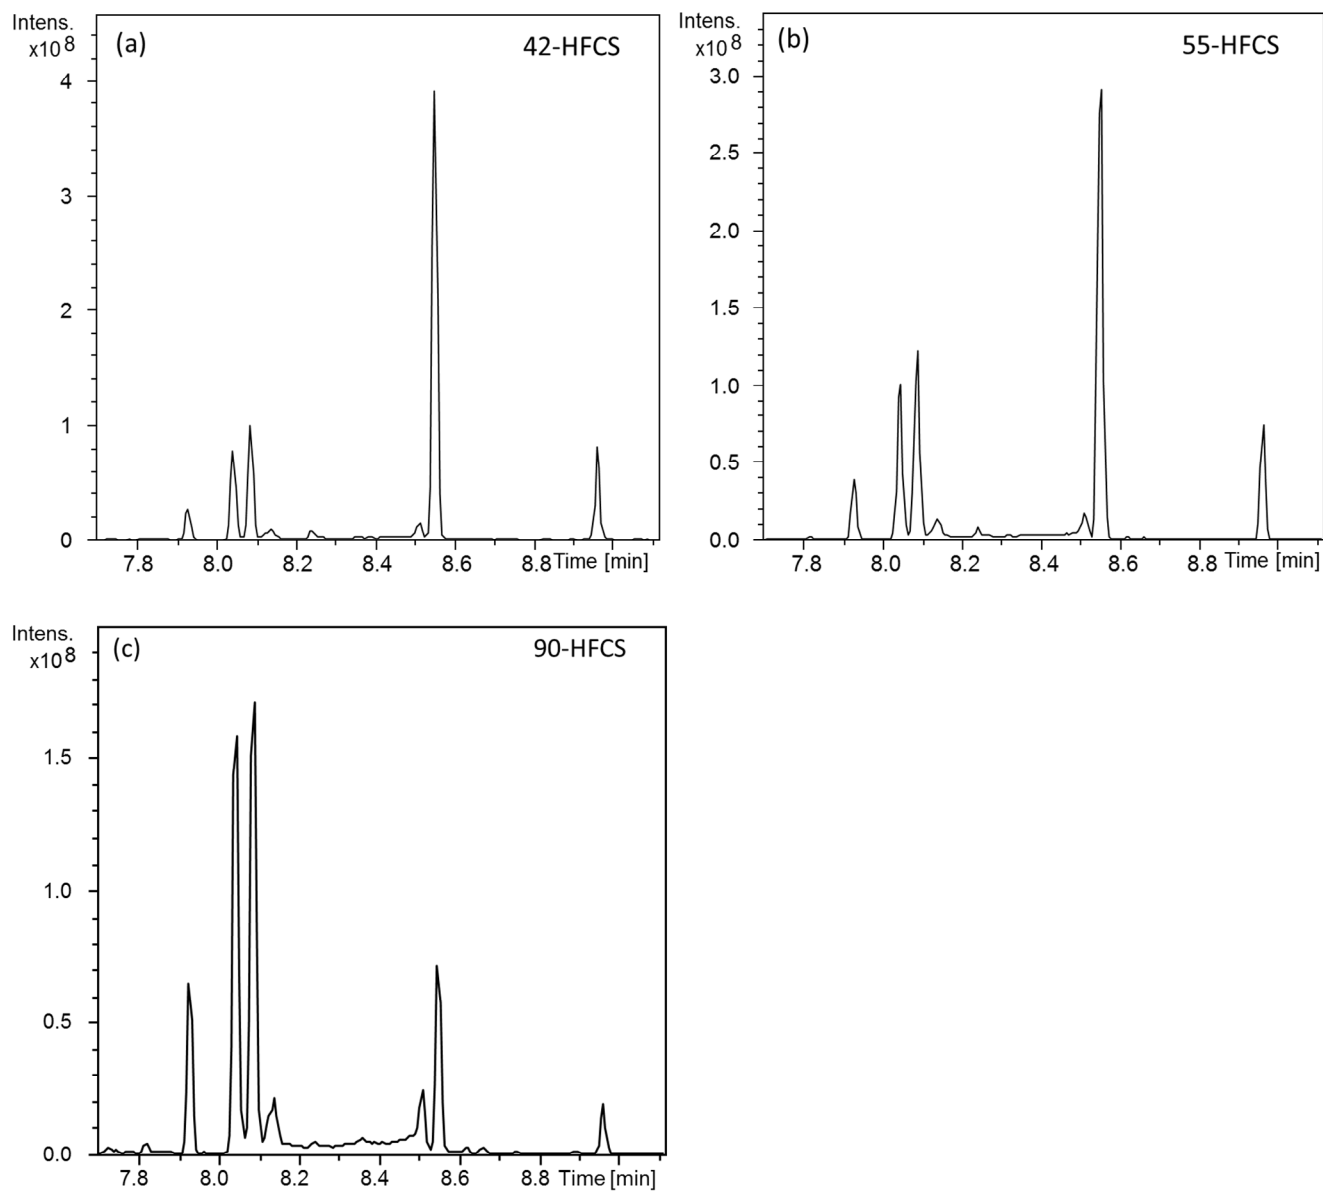

Figure S-3: Chromatograms three samples of HFCS: (a) 42-HFCS, (b) 55-HFCS, and (c) 90-HFCS
